# Supplementary material for: Safety and efficacy of Edaravone Dexborneol versus edaravone for patients with acute ischaemic stroke: a phase II, multicentre, randomised, double-blind, multiple-dose, active-controlled clinical trial
Source: PubMed Central journal article supplement — Stroke Vasc Neurol. 2019 Apr 22;4(3):109–14. doi: 10.1136/svn-2018-000221 (PMC6812637; doi:10.1136/svn-2018-000221), 2019-04-22
Supplement: svn-2018-000221supp001.pdf [file svn-2018-000221supp001.pdf]

## Supplementary materials

**Supplementary Table 1** The details of adverse reactions in control, low-dose, medium-dose and high-dose groups.

|                              | <b>Adverse reactions</b>                                                                                                                                                                                                                                                                                                                                                                                                                                                                     |
|------------------------------|----------------------------------------------------------------------------------------------------------------------------------------------------------------------------------------------------------------------------------------------------------------------------------------------------------------------------------------------------------------------------------------------------------------------------------------------------------------------------------------------|
| <b>Control<br/>n=98</b>      | ALT increased2 (2.04%) ,APTT prolonged1 (1.02%) ,AST increased1 (1.02%) ,Dyspnea1 (1.02%) ,Eczema1 (1.02%) ,PT prolonged1 (1.02%) ,Pulmonary infection1 (1.02%) ,<br>γ-GPT increased1 (1.02%)                                                                                                                                                                                                                                                                                                |
| <b>Low-dose<br/>n=102</b>    | AST increased2 (1.96%),ALT increased1 (0.98%) ,Cerebellar infarction1 (0.98%) ,CK-MB increased1 (0.98%) ,Decreased serum fibrinogen1 (0.98%) ,Decreased serum potassium1 (0.98%) ,<br>Dizzy1 (0.98%) ,Erythra1 (0.98%) ,Headache1 (0.98%) ,lipid elevated1 (0.98%) ,Palpitation1 (0.98%) ,Rhino1 (0.98%) ,Serum creatinine elevation1 (0.98%)                                                                                                                                                |
| <b>Medium-dose<br/>n=101</b> | AST increased4 (3.96%) ,ALT increased3 (2.97%) ,CK-MB increased3 (2.97%) ,Abdominal discomfort1 (0.99%) ,Acid indigestion1 (0.99%) ,Decreased appetite1 (0.99%) ,Dyspnea1 (0.99%) ,Erythra1 (0.99%) ,Eosinophile granulocyte decreased1 (0.99%) ,Hemoglobin decreased1 (0.99%) ,Leukopenia decreased1 (0.99%) ,Pectoralgia1 (0.99%) ,Pruritus1 (0.99%) ,<br>RBC decreased1 (0.99%) ,Serum creatinine elevation1 (0.99%) ,Thrombocytopenia decreased1 (0.99%)                                 |
| <b>High-dose<br/>n=99</b>    | AST increased4 (4.04%) ,ALT increased3 (3.03%) ,Pruritus3 (3.03%) ,Dyspnea2 (2.02%) ,Erythema2 (2.02%) ,Acid indigestion1 (1.01%) ,Acute renal injury1 (1.01%) ,Allergic dermatitis1 (1.01%) ,Arthralgia1 (1.01%) ,Constipation1 (1.01%) ,Dermatitis1 (1.01%) ,Erythema perineum1 (1.01%) ,Erythra1 (1.01%) ,Hyperlipidemia1 (1.01%) ,Hypoglycemia1 (1.01%) ,Hypokalemia1 (1.01%) ,Leukocyte positive in urine1 (1.01%) ,Liver injur1 (1.01%) ,Palpitation1 (1.01%) , Serum albumin1 (1.01%) |

**Supplementary Table 2** Summary of pharmacokinetic studies of edaravone, (+)-borneol or compound edaravone in SD rats and Beagle dogs

| Species                                      | Intravenous administration                  |                                             | Comparative pharmacokinetics                                                                                                                                                                                                                                                                                                                                                                                                                                                                                                                                                                               |                                                                                                                                                                                                                                            |                                                                                                                                                                                                                                                                                                                                                                                            |
|----------------------------------------------|---------------------------------------------|---------------------------------------------|------------------------------------------------------------------------------------------------------------------------------------------------------------------------------------------------------------------------------------------------------------------------------------------------------------------------------------------------------------------------------------------------------------------------------------------------------------------------------------------------------------------------------------------------------------------------------------------------------------|--------------------------------------------------------------------------------------------------------------------------------------------------------------------------------------------------------------------------------------------|--------------------------------------------------------------------------------------------------------------------------------------------------------------------------------------------------------------------------------------------------------------------------------------------------------------------------------------------------------------------------------------------|
|                                              | Edaravone or (+)-borneol alone              | Compound Edaravone (Edaravone: borneol=4:1) | PK Parameters                                                                                                                                                                                                                                                                                                                                                                                                                                                                                                                                                                                              | Distribution *                                                                                                                                                                                                                             | Metabolism and Excretion*                                                                                                                                                                                                                                                                                                                                                                  |
| SD rats                                      | edaravone<br>0.60, 1.20, 2.40, 7.20 mg/kg   | 0.75, 1.50, 3.00, 9.00 mg/kg                | <ul style="list-style-type: none"> <li>Linear dose-dependent AUC of edaravone:                             <ul style="list-style-type: none"> <li>✓ AUC<sub>0-∞</sub>: 827.7, 2383.5, 3878.7, 10759.9 ng/mL·h respectively for dosing of edaravone;</li> <li>✓ AUC<sub>0-∞</sub>: 784.6, 2103.4, 3636.2, 11743.0 ng/mL·h respectively for dosing of compound edaravone.</li> </ul> </li> <li>No significant differences of PK parameters</li> </ul>                                                                                                                                                        | <ul style="list-style-type: none"> <li>Rapid distribution and elimination for each tissue</li> <li>No distinct accumulation</li> <li>No significant difference in vitro tissues</li> <li>No effect of (+)-Borneol on Edaravone</li> </ul>  | <ul style="list-style-type: none"> <li>Glucuronide conjunction and sulfate conjunction were major metabolites and excretion form</li> <li>mostly excreted in urine and bile</li> <li>approximately 80.3% and 82.5% respectively after 72 hours</li> <li>no significant difference in excretion ratios</li> <li>no apparent impact of (+)-borneol on the excretion of edaravone.</li> </ul> |
|                                              | (+)-borneol<br>0.15, 0.30, 0.60, 1.80 mg/kg |                                             | <ul style="list-style-type: none"> <li>Linear dose-dependent AUC of (+)-borneol:                             <ul style="list-style-type: none"> <li>✓ AUC<sub>0-∞</sub>: 12.5, 31.1, 65.9, 194.0 ng/mL·h respectively for dosing of (+)-borneol;</li> <li>✓ AUC<sub>0-∞</sub>: 21.7, 39.2, 73.3, 246.3 ng/mL·h respectively for dosing of compound edaravone.</li> </ul> </li> <li>No significant differences of PK parameters</li> </ul>                                                                                                                                                                  | <ul style="list-style-type: none"> <li>Rapid distribution and elimination for most tissues</li> <li>No distinct accumulation</li> <li>No significant difference in vitro tissues</li> <li>No effect of edaravone on (+)-borneol</li> </ul> | <ul style="list-style-type: none"> <li>glucuronide conjunction was major metabolite, camphor as trace</li> <li>mostly excreted in urine and bile</li> <li>approximately 20.4% and 21.2% respectively after 72 hours (glucuronide conjunction was not quantitatively analyzed)</li> <li>no significant difference in excretion ratios</li> </ul>                                            |
| Beagle dogs                                  | edaravone<br>2.4, 4.8, 9.6 mg/kg            | 3.0, 6.0, 12 mg/kg                          | <ul style="list-style-type: none"> <li>A dose dependent non-linear increase in AUC values:                             <ul style="list-style-type: none"> <li>✓ AUC<sub>0-∞</sub> : 30977.6, 51648.3, 65479.8 ng·h/ml for dosing of edaravone;</li> <li>✓ AUC<sub>0-∞</sub>: 28341.4, 48593.2, 60077.6 ng·h/ml for dosing of compound edaravone</li> </ul> </li> <li>No differences in pharmacokinetic parameters between single and repeated 7-day dose</li> <li>No effect of (+)-borneol on the PK profile of edaravone</li> </ul>                                                                       |                                                                                                                                                                                                                                            |                                                                                                                                                                                                                                                                                                                                                                                            |
|                                              | (+)-borneol<br>0.6, 1.2, 2.4 mg/kg          |                                             | <ul style="list-style-type: none"> <li>A dose dependent linear increase in AUC values of (+)-borneol:                             <ul style="list-style-type: none"> <li>✓ AUC<sub>0-∞</sub>: 99.8, 197.9, 501.2 ng·h/ml for dosing of (+)-borneol;</li> <li>✓ AUC<sub>0-∞</sub>: 114.9, 207.3, 432.1 ng/mL for dosing of compound edaravone</li> </ul> </li> <li>No differences in pharmacokinetic parameters between single and repeated 7-day dose</li> <li>No effect of edaravone on the PK profile of (+)-borneol</li> <li>A slight accumulation trend after repeated 7-day administration</li> </ul> |                                                                                                                                                                                                                                            |                                                                                                                                                                                                                                                                                                                                                                                            |
| <b>Other pharmacokinetic characteristics</b> |                                             |                                             |                                                                                                                                                                                                                                                                                                                                                                                                                                                                                                                                                                                                            |                                                                                                                                                                                                                                            |                                                                                                                                                                                                                                                                                                                                                                                            |

| Compounds                          | Plasma protein binding                                                                                                                                                                                | CYP enzyme inhibition                                                                                                                                               | CYP Enzyme Induction                                                                                                                                                                                                                                                                                                    |
|------------------------------------|-------------------------------------------------------------------------------------------------------------------------------------------------------------------------------------------------------|---------------------------------------------------------------------------------------------------------------------------------------------------------------------|-------------------------------------------------------------------------------------------------------------------------------------------------------------------------------------------------------------------------------------------------------------------------------------------------------------------------|
| edaravone/<br>compound edaravone   | <ul style="list-style-type: none"> <li>Species differences: dog was lower than rat and human</li> <li>Saturation phenomenon at 50000 ng/mL</li> <li>No impact of (+)-borneol on edaravone.</li> </ul> | <ul style="list-style-type: none"> <li>CYP1A2, CYP2C9, CYP2C19, CYP2D6 and CYP3A4 IC50 &gt; 100 µmol/L for edaravone, (+)-borneol and compound edaravone</li> </ul> | <ul style="list-style-type: none"> <li>0.15, 0.45, 1.50 mg/kg of (+)-borneol, 0.60, 1.80, 6.00 mg/kg of edaravone, 0.75, 2.25 7.50 mg/kg of compound edaravone (4:1)</li> <li>Tested in rats after 7-day of intravenous administrations</li> <li>No apparent induction of CYP1A2, CYP2C9, CYP2C19 and CYP3A4</li> </ul> |
| (+)-borneol/<br>compound edaravone | <ul style="list-style-type: none"> <li>No apparent species differences (60.8-77.1%)</li> <li>No saturation phenomenon at 5000 ng/mL</li> <li>No impact of edaravone on (+)-borneol</li> </ul>         |                                                                                                                                                                     |                                                                                                                                                                                                                                                                                                                         |

\***Note:** 2.4 mg/kg Edaravone, 0.60 mg/kg (+)-borneol and 3.0 mg/kg compound edaravone (edaravone: (+)-borneol=4:1) were used for distribution and excretion study.

Abbreviation: PK, Pharmacokinetic; SD, Sprague Dawley; AUC, area under the curve; CYP, cytochrome P450

**Supplementary Table 3** Summary of preclinical toxicology Studies of compound edaravone

| Type of study                    | Species/Strain     | Route | Dose mg/kg           | n/Sex/Group  | GLP  | Observed Maximum Nonlethal Dose (mg/kg) | NOAEL mg/kg | Noteworthy findings                                                                                                                                                                           |
|----------------------------------|--------------------|-------|----------------------|--------------|------|-----------------------------------------|-------------|-----------------------------------------------------------------------------------------------------------------------------------------------------------------------------------------------|
| Acute toxicity Study (combo)     | SD rats            | i.v.  | 25, 50, 100          | 10           | GLP  | >100                                    | 25          | <ul style="list-style-type: none"> <li>Red urine in rats of 50mg/kg group</li> </ul>                                                                                                          |
| Dose range finding study(combo)  | Beagle dogs        | i.v.  | 50, 100, 200         | 2            | GLP  | >200                                    | 50          | <ul style="list-style-type: none"> <li>Red urine and tubular degeneration in kidney in rats of 100 or 200mg/kg group</li> </ul>                                                               |
| Repeat-dose toxicity study       | SD rats            | i.v.  | 10, 20, 40           | 15<br>11(TK) | GLP  | 20                                      | 20          | <ul style="list-style-type: none"> <li>Red urine, correlated decrease in RBC and HGB, and increase in Retic in 6.4% Propylene Glycol or 40 mg/kg group</li> </ul>                             |
|                                  | Beagle dogs        | i.v.  | 25, 50, 100          | 6<br>4(TK)   | GLP  | 50                                      | 50          | <ul style="list-style-type: none"> <li>Adverse effects in the kidneys and injection site in 100 mg/kg group</li> </ul>                                                                        |
| Reproduction Toxicity Segment I  | SD rat             | i.v.  | 6.25, 12.5, 25       | 24/sex       | expl |                                         |             | <ul style="list-style-type: none"> <li>No apparent toxicity in fertility or early embryonic development</li> <li>Red urine, a slight decrease in body weights and food consumption</li> </ul> |
| Reproduction Toxicity Segment II | SD rat             | i.v.  | 6.25, 12.5, 25       | 25(or 26)    | expl |                                         |             | <ul style="list-style-type: none"> <li>No embryo-fetal developmental toxicity</li> <li>Red urine</li> </ul>                                                                                   |
| Reproduction Toxicity Segment II | New Zealand rabbit | i.v.  | 2.5, 5, 10           | 15           | expl |                                         |             | <ul style="list-style-type: none"> <li>No apparent parental or embryo-fetal developmental toxicity</li> </ul>                                                                                 |
| Active systemic anaphylaxis      | Guinea pig         | i.v.  | 2, 5                 | 3            | expl |                                         |             | <ul style="list-style-type: none"> <li>No anaphylactic reaction</li> </ul>                                                                                                                    |
| Passive cutaneous anaphylaxis    | SD rat             | i.v.  | 2.5, 12.5            | 3            | expl |                                         |             | <ul style="list-style-type: none"> <li>No passive cutaneous anaphylaxis</li> </ul>                                                                                                            |
| Vascular irritation              | New Zealand rabbit | i.v.  | 3.75mg(10ml)/kg      | 2            | expl |                                         |             | <ul style="list-style-type: none"> <li>No apparent local irritation</li> </ul>                                                                                                                |
| Intramuscular irritation         | New Zealand rabbit | i.m.  | 1 ml (0.375 mg)/site | 2            | expl |                                         |             | <ul style="list-style-type: none"> <li>No apparent or severe muscular irritation</li> </ul>                                                                                                   |

|                           |                        |                 |                           |   |      |  |  |                                                                                                                                                                                        |
|---------------------------|------------------------|-----------------|---------------------------|---|------|--|--|----------------------------------------------------------------------------------------------------------------------------------------------------------------------------------------|
| Hemolysis                 | Rabbit red blood cells | <i>In vitro</i> | 0.1, 0.2, 0.3, 0.4, 0.5ml | - | expl |  |  | <ul style="list-style-type: none"> <li>No hemolysis or agglutination</li> </ul>                                                                                                        |
| CV and Respiratory System | Beagle dog             | i.v.            | 25, 50, 100               | 3 | expl |  |  | <ul style="list-style-type: none"> <li>A transient and slight increase in blood pressure. No effect on the function of respiratory system or body temperature</li> </ul>               |
| CNS                       | ICR mice               | i.v.            | 8, 25, 75                 | 5 | expl |  |  | <ul style="list-style-type: none"> <li>A decrease in spontaneous activities and a positive and negative synergistic effect with subthreshold hypnotic dose of pentobarbital</li> </ul> |

Abbreviation: SD, Sprague Dawley; NOAEL, no observed adverse effect level; TK,

toxicokinetics; CV, cardiovascular; CNS, central nervous system; GLP, good laboratory practice;

expl, exploration, i.v., intravenous; i.m., intramuscular.

**Supplementary Table 4** Summary of genetic toxicology studies of compound edaravone

| <b>Studies</b>                                                               | <b>GLP</b> | <b>Route</b> | <b>Dose</b>                           | <b>-S9</b> | <b>+S9</b> |
|------------------------------------------------------------------------------|------------|--------------|---------------------------------------|------------|------------|
| Reverse mutation study in <i>Salmonella Typhimurium</i>                      | expl       | -            | 250, 25, 2.5, 0.25, 0.025<br>µg/plate | N          | N          |
| <i>In vitro</i> chromosome aberration in cultured Chinese Hamster Lung Cells | expl       | -            | 200, 100, 50, 25µg/ml                 | N          | N          |
| <i>In vivo</i> mouse bone marrow micronucleus test                           | expl       | i.v.         | 31.25, 62.5, 125mg/kg                 | N          | N/A        |

Abbreviation: GLP, good laboratory practice; expl, exploration; N, negative, N/A, not applicable.
